# Supplementary material
Source: Springer Nature journal article supplement (https://www.springermedizin.de/resource/supplementary/12913_2012_2594_MOESM2_ESM.pdf/9532118)

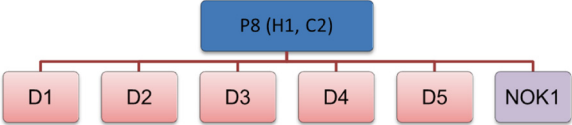

D =decision-maker

NOK = Next of Kin

Supplement: MOESM2 [file 9532118]
